# Supplementary material for: hMMS2 serves a redundant role in human PCNA polyubiquitination
Source: PubMed Central journal article supplement (PMC2263069; doi:10.1186/1471-2199-9-24), 2008-02-19

A.

Hela

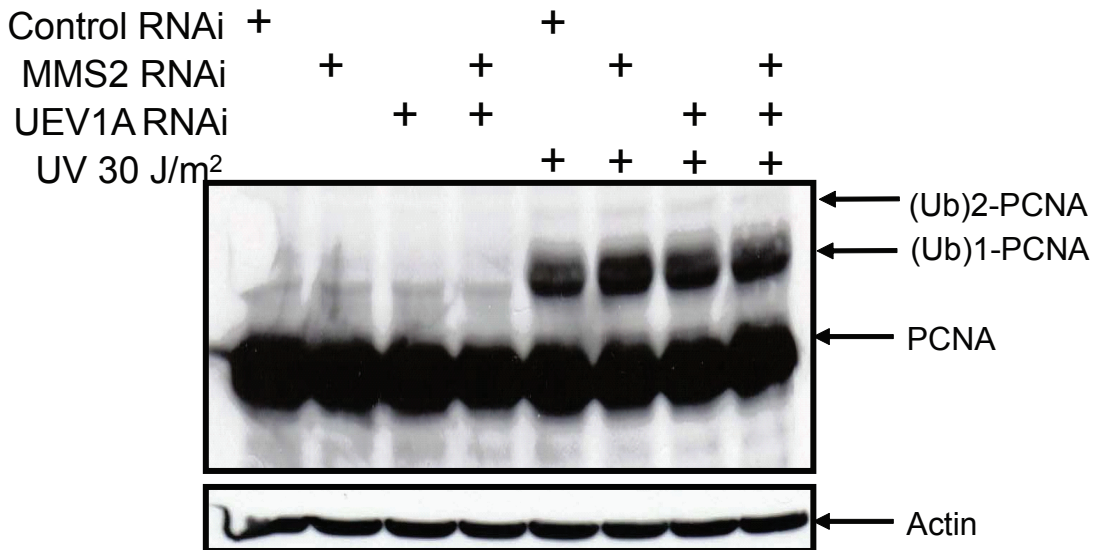

B.

293T

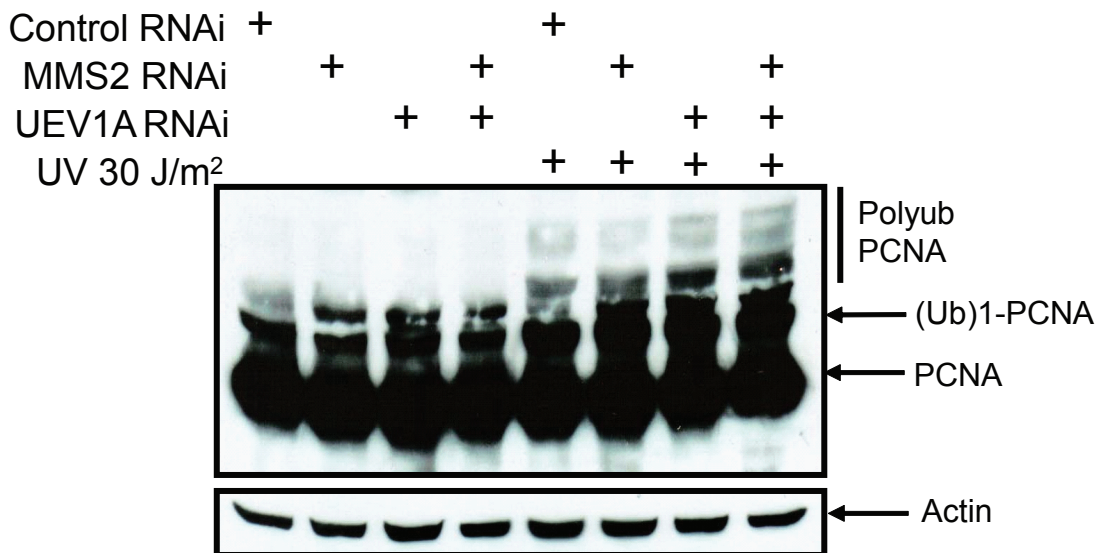

Supplement: 1471-2199-9-24-S3.pdf [file 1471-2199-9-24-S3.pdf]
